# Supplementary material for: Systemic LRG1 Expression in Melanoma is Associated with Disease Progression and Recurrence
Source: PubMed Central journal article supplement (PMC10117404; doi:10.1158/2767-9764.crc-23-0015), 2023-04-20
Supplement: crc-23-0015-s01.pdf [file crc-23-0015-s01.pdf]

**Table S1: Overview evaluated immuno-oncology markers by Olink proteomic assay**

| <b>Immuno-oncology markers</b> |                     |         |       |              |               |        |               |
|--------------------------------|---------------------|---------|-------|--------------|---------------|--------|---------------|
| IL-8                           | TNFRSF9             | TIE2    | MCP-3 | CD40-L       | IL-1 $\alpha$ | CD244  | EGF           |
| PGF                            | IL-6                | ADGRG1  | MCP-1 | CRTAM        | CXCL11        | MCP-4  | TRAIL         |
| FGF2                           | CXCL9               | CD8A    | CAIX  | IFN- $\beta$ | ADA           | CD4    | NOS3          |
| IL-2                           | Gal-9               | VEGFR-2 | CD40  | IL-18        | GZMH          | VEGFC  | IL-12         |
| CXCL1                          | TNFSF14             | IL-33   | TWEAK | CSF-1        | PDCD1         | FASLG  | CD28          |
| CCL19                          | MCP-2               | CCL4    | IL-35 | Gal-1        | PD-L1         | CD27   | CXCL5         |
| IL-5                           | HGF                 | GZMA    | HO-1  | CX3CL1       | CXCL10        | CD70   | IL-10         |
| CD83                           | CCL23               | CD5     | CCL3  | MMP7         | ARG1          | NCR1   | DCN           |
| TNFRSF21                       | TNFRSF4             | MIC-A/B | CCL17 | ANGPT2       | PTN           | CXCL12 | IFN- $\gamma$ |
| LAMP3                          | CASP-8              | ICOSLG  | MMP12 | CXCL13       | PD-L2         | VEGFA  | IL-4          |
| IL-21                          | IL12RB1             | IL-13   | CCL20 | TNF          | KLRD1         | GZMB   | TNFRSF12A     |
| PDGF<br>subunit B              | LAP TGF- $\beta$ -1 |         |       |              |               |        |               |
