# Supplementary material for: Systemic LRG1 Expression in Melanoma is Associated with Disease Progression and Recurrence
Source: PubMed Central journal article supplement (PMC10117404; doi:10.1158/2767-9764.crc-23-0015), 2023-04-20
Supplement: crc-23-0015-s02.pdf [file crc-23-0015-s02.pdf]

**Table S2: Patient characteristics OpACIN-neo**

| Characteristics                                                                              | Total cohort (n=86) |       |
|----------------------------------------------------------------------------------------------|---------------------|-------|
| Institute                                                                                    |                     |       |
| Netherlands Cancer Institute                                                                 | 46                  | (53%) |
| Melanoma Institute Australia                                                                 | 38                  | (44%) |
| Karolinska Institute                                                                         | 2                   | (2%)  |
| Age, years (median, IQR)                                                                     |                     |       |
|                                                                                              | 58, 45-65           |       |
| Sex                                                                                          |                     |       |
| Men                                                                                          | 49                  | (57%) |
| Women                                                                                        | 37                  | (43%) |
| Primary tumor stage                                                                          |                     |       |
| T1a/b                                                                                        | 29                  | (34%) |
| T2a/b                                                                                        | 9                   | (10%) |
| T3a/b                                                                                        | 14                  | (16%) |
| T4a/b                                                                                        | 10                  | (12%) |
| Tx                                                                                           | 24                  | (28%) |
| Treatment                                                                                    |                     |       |
| 2x IPI 3 mg kg <sup>-1</sup> + NIVO 1 mg kg <sup>-1</sup> q3wk                               | 30                  | (35%) |
| 2x IPI 1 mg kg <sup>-1</sup> + NIVO 3 mg kg <sup>-1</sup> q3wk                               | 30                  | (35%) |
| 2x IPI 3 mg kg <sup>-1</sup> q3wk directly followed by<br>2x NIVO 3 mg kg <sup>-1</sup> q3wk | 26                  | (30%) |
| Pathologic response                                                                          |                     |       |
| Yes                                                                                          | 64                  | (74%) |
| No                                                                                           | 21                  | (24%) |
| NE <sup>a</sup>                                                                              | 1                   | (1%)  |
| Recurrence <sup>b</sup>                                                                      |                     |       |
| Yes                                                                                          | 16                  | (19%) |
| No                                                                                           | 70                  | (81%) |
| Alive <sup>b</sup>                                                                           |                     |       |
| Yes                                                                                          | 79                  | (92%) |
| No                                                                                           | 7                   | (8%)  |

Percentages may not sum up to 100 because of rounding.

<sup>a</sup> Patient did not undergo surgery because of toxicity

<sup>b</sup> At data cutoff (14 February 2022), the median follow-up from data of registration was 47 months, with a minimum follow-up of 38 months for all patients alive.

IPI; ipilimumab, NIVO; nivolumab, IQR; interquartile range
