# Supplementary material for: Systemic LRG1 Expression in Melanoma is Associated with Disease Progression and Recurrence
Source: PubMed Central journal article supplement (PMC10117404; doi:10.1158/2767-9764.crc-23-0015), 2023-04-20
Supplement: crc-23-0015-s03.pdf [file crc-23-0015-s03.pdf]

**Table S3: Patient characteristics PRADO**

| Characteristics              | Total cohort (n=49) |        |
|------------------------------|---------------------|--------|
| Institute                    |                     |        |
| Netherlands Cancer Institute | 49                  | (100%) |
| Age, years (median, IQR)     | 58, 52-68           |        |
| Sex                          |                     |        |
| Men                          | 32                  | (65%)  |
| Women                        | 17                  | (35%)  |
| Primary tumor stage          |                     |        |
| T1a/b                        | 6                   | (12%)  |
| T2a/b                        | 13                  | (27%)  |
| T3a/b                        | 13                  | (27%)  |
| T4a/b                        | 12                  | (24%)  |
| Tx                           | 1                   | (2%)   |
| Unknown primary              | 4                   | (8%)   |
| Pathologic response          |                     |        |
| Yes                          | 38                  | (78%)  |
| No                           | 11                  | (22%)  |
| Recurrence <sup>a</sup>      |                     |        |
| Yes                          | 12                  | (24%)  |
| No                           | 37                  | (76%)  |
| Alive <sup>a</sup>           |                     |        |
| Yes                          | 45                  | (92%)  |
| No                           | 4                   | (8%)   |

<sup>a</sup> At data cutoff (7 February 2022), the median follow-up from data of registration was 28.1 months, with a minimum follow-up of 23.4 months for all patients alive.  
IQR; interquartile range
