# Supplementary material for: Systemic LRG1 Expression in Melanoma is Associated with Disease Progression and Recurrence
Source: PubMed Central journal article supplement (PMC10117404; doi:10.1158/2767-9764.crc-23-0015), 2023-04-20
Supplement: crc-23-0015-s04.pdf [file crc-23-0015-s04.pdf]

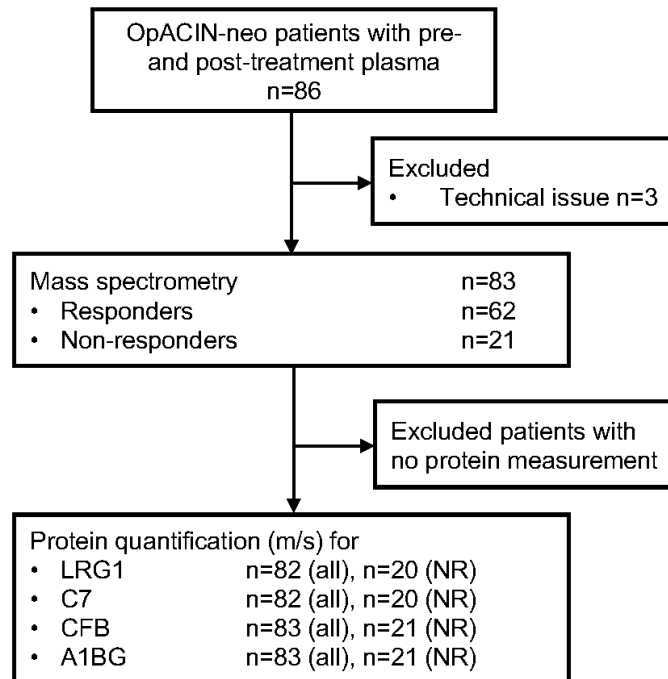

**Figure S1: Flowchart of patients OpACIN-neo study.** Number of patients included for mass spectrometry. For every patient, two plasma samples were analyzed: one baseline samples (pre-treatment) sample and one post-treatment (after neoadjuvant ICB therapy) sample at week 6. Mass spectrometry data was available for 83 patients that had measurements for both pre-treatment and post-treatment samples. Patients with no measurement for certain proteins (e.g. LRG1 and C7) were excluded from the corresponding analysis. NR; non-responding patients
