# Supplementary material for: Systemic LRG1 Expression in Melanoma is Associated with Disease Progression and Recurrence
Source: PubMed Central journal article supplement (PMC10117404; doi:10.1158/2767-9764.crc-23-0015), 2023-04-20
Supplement: crc-23-0015-s05.pdf [file crc-23-0015-s05.pdf]

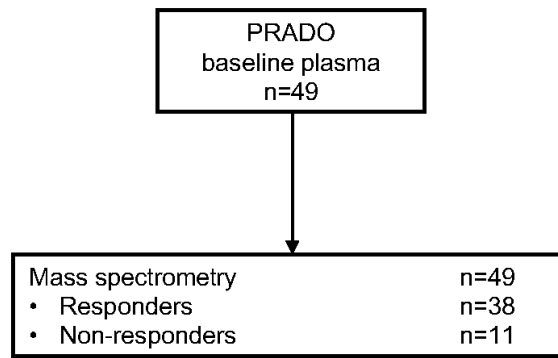

**Figure S2: Flowchart of patients PRADO study.** A total of 49 patients from the PRADO study were included for mass spectrometry. The baseline (pre-treatment) plasma samples of patients were analyzed.
