# Supplementary material for: Systemic LRG1 Expression in Melanoma is Associated with Disease Progression and Recurrence
Source: PubMed Central journal article supplement (PMC10117404; doi:10.1158/2767-9764.crc-23-0015), 2023-04-20
Supplement: crc-23-0015-s06.pdf [file crc-23-0015-s06.pdf]

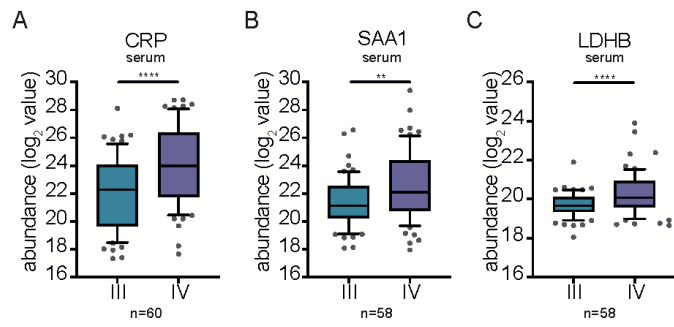

**Figure S3: SAA1, CRP and LDHB are associated with melanoma disease progression.** Serum expression of **(A)** C-reactive protein (CRP) (n=60), **(B)** serum amyloid A1 (SAA1) (n=58) and **(C)** lactate dehydrogenase B (LDHB) (n=58) by patients with stage III disease that developed stage IV disease, as measured by mass spectrometry. A two-tailed paired Student's *t*-test was used to determine statistical significance between stage III and stage IV samples. \*\*,  $P < 0.01$ , \*\*\*\*,  $P < 0.0001$
