# Supplementary material for: Systemic LRG1 Expression in Melanoma is Associated with Disease Progression and Recurrence
Source: PubMed Central journal article supplement (PMC10117404; doi:10.1158/2767-9764.crc-23-0015), 2023-04-20
Supplement: crc-23-0015-s08.pdf [file crc-23-0015-s08.pdf]

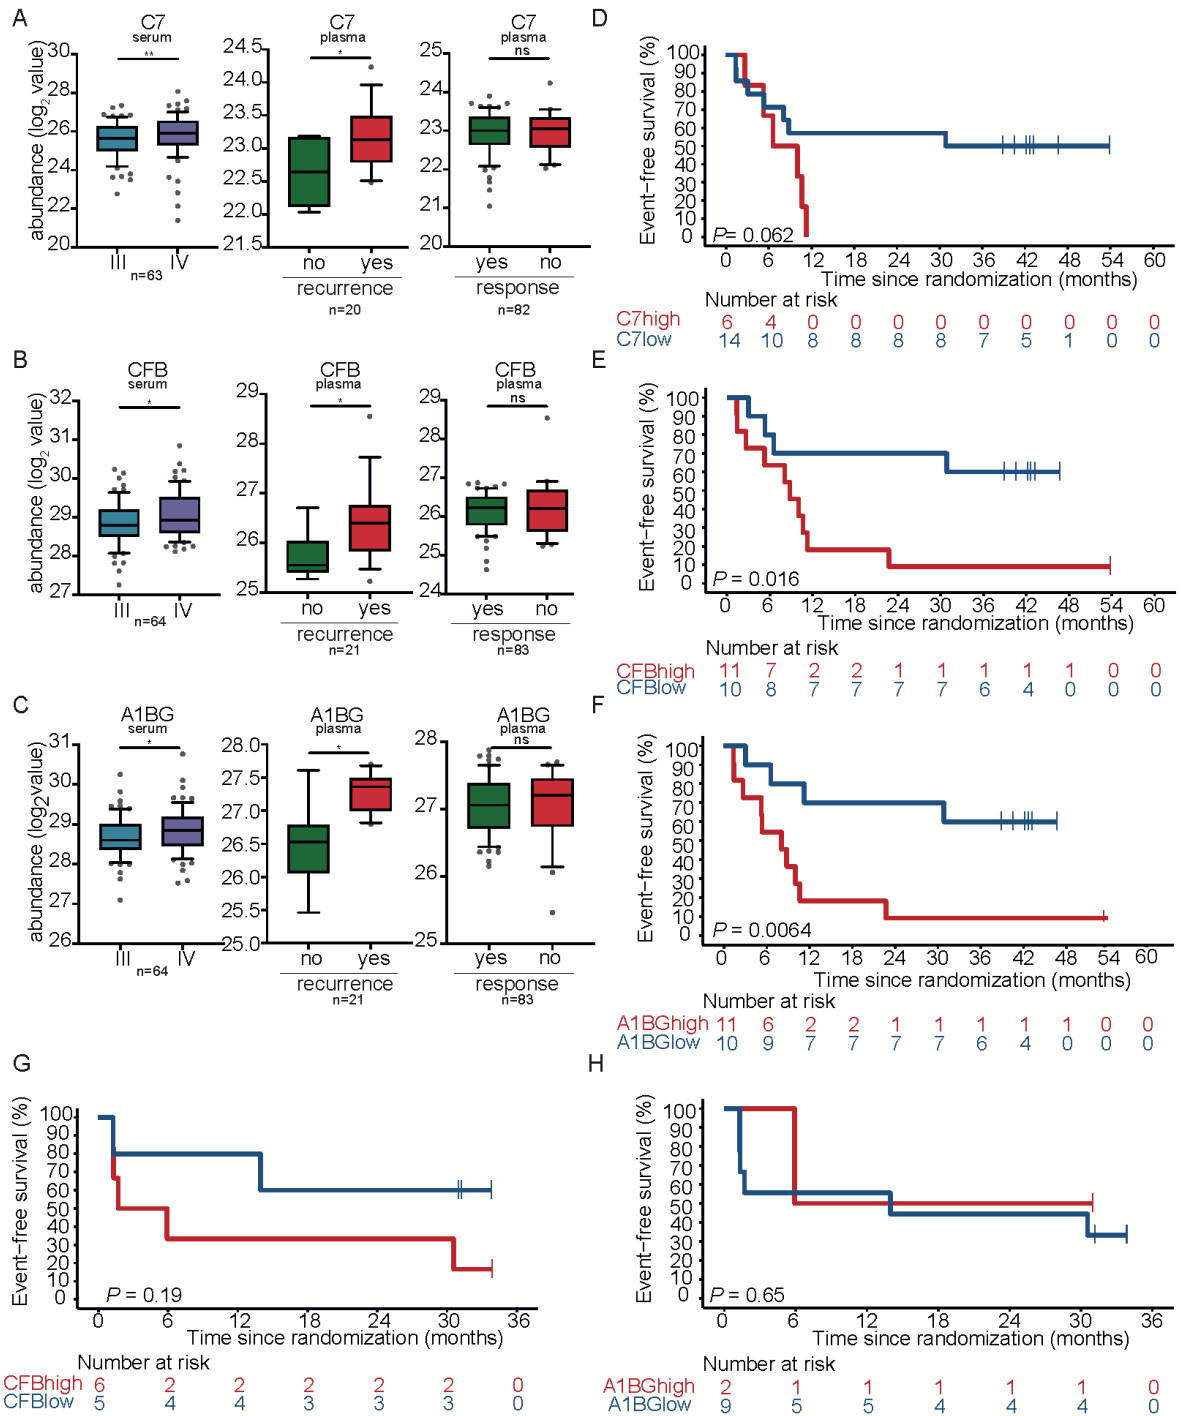

**Figure S5: Complement factor B (CFB), component 7 (C7) expression and alpha-1B-glycoprotein (A1BG) are increased upon melanoma progression and recurrence. (A-C)** Normalized protein expression ( $\log_2$ ) values of **(A)** C7, **(B)** CFB and **(C)** A1BG, measured by mass spectrometry for matched stage III and IV patients ( $n=63$  for C7,  $n=64$  for CFB and A1BG), non-responsive patients of OpACIN-neo study ( $n=20$  for C7,  $n=21$  for CFB and A1BG) and all patients of the OpACIN-neo study ( $n=82$  for C7,  $n=83$  for CFB and A1BG). A two-tailed paired Student's *t*-test was used to determine statistical significance between stage III and stage IV samples. A two-tailed unpaired Student's *t*-test for comparing patients with and without a recurrence or response of the OpACIN-neo study, using a Welch's *t*-test when variances were significantly different. **(D-F)** A Kaplan Meier curve showing event-free survival (EFS) for non-responder patients of the OpACIN-neo study with either a high (red) or low (blue) expression of **(D)** C7, **(E)** CFB and **(F)** A1BG. *P* value was calculated using the log-rank test (two-sided) and significance is indicated. **(G-H)** A Kaplan Meier curve showing event-free survival (EFS) for non-responder patients

of the PRADO study with either a high (red) or low (blue) expression of **(G)** CFB and **(H)** A1BG. *P* value was calculated using the log-rank test (two-sided) and significance is indicated. \*,  $P < 0.05$ , \*\*,  $P < 0.01$
