# Supplementary material for: Systemic LRG1 Expression in Melanoma is Associated with Disease Progression and Recurrence
Source: PubMed Central journal article supplement (PMC10117404; doi:10.1158/2767-9764.crc-23-0015), 2023-04-20
Supplement: crc-23-0015-s09.pdf [file crc-23-0015-s09.pdf]

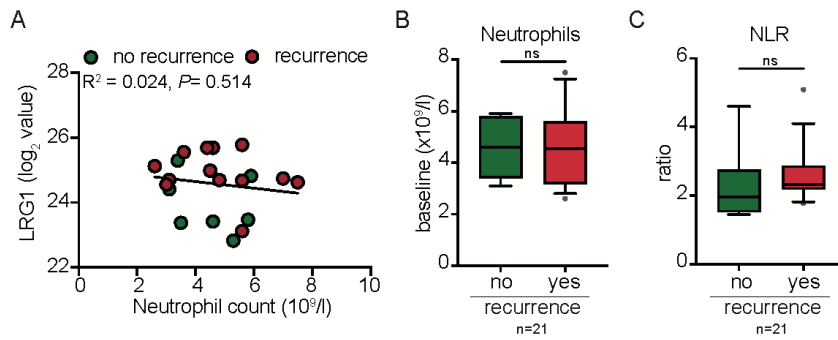

**Figure S6: Neutrophil count and neutrophil-to-lymphocyte ratio (NLR) are not associated with recurrence in non-responding patients.** Analysis of pre-treatment samples of non-responding patients of the OpACIN-neo study. **(A)** Correlation between systemic normalized LRG1 expression and neutrophil count for patients without a recurrence (green dots) or without a recurrence (red dots). The correlation coefficient and  $p$ -value were computed using the Pearson correlation method. **(B)** Neutrophil count and **(C)** neutrophil-to-lymphocyte ratio at baseline for non-responding patients with or without a response ( $n=21$ ). A two-tailed unpaired Student's  $t$ -test was used to compare patients with and without a recurrence.
